# Supplementary material for: Multicenter Study of the Risk Factors and Outcomes of Bloodstream Infections Caused by Carbapenem-Non-Susceptible Acinetobacter baumannii in Indonesia
Source: Trop Med Infect Dis. 2022 Jul 31;7(8):161. doi: 10.3390/tropicalmed7080161 (PMC9412432; doi:10.3390/tropicalmed7080161)
Supplement: Supplementary file 1 [file tropicalmed-07-00161-s001.zip › tropicalmed-1812709-supplementary.pdf]

## Supplementary files

**Table S1.** Comparison of case distribution of carbapenem susceptible *Acinetobacter baumannii* (CSAB) and carbapenem non-susceptible *Acinetobacter baumannii* (CNSAB) based on site, island, and year of sampling

|                           | CSAB<br>N=72 | CNSAB<br>N=72 | Total<br>N=144 | p-value |
|---------------------------|--------------|---------------|----------------|---------|
| Site                      |              |               |                | 0.50    |
| Arifin Achmad Hospital    | 35 (48.6%)   | 28 (38.9%)    | 63 (43.8%)     |         |
| Dr Soetomo Hospital       | 26 (36.1%)   | 31 (43.1%)    | 57 (39.6%)     |         |
| Dr Syaiful Anwar Hospital | 11 (15.3%)   | 13 (18.1%)    | 24 (16.7%)     |         |
| Island                    |              |               |                | 0.24    |
| Sumatra                   | 35 (48.6%)   | 28 (38.9%)    | 63 (43.8%)     |         |
| Java                      | 37 (51.4%)   | 44 (61.1%)    | 81 (56.3%)     |         |
| Year                      |              |               |                | 0.37    |
| 2019                      | 16 (22.2%)   | 17 (23.6%)    | 33 (22.9%)     |         |
| 2020                      | 36 (50.0%)   | 42 (58.3%)    | 78 (54.2%)     |         |
| 2021                      | 20 (27.8%)   | 13 (18.1%)    | 33 (22.9%)     |         |
